# Supplementary material
Source: PubMed Central journal article supplement (PMC8818017)
Supplement: NIHMS1738029-supplement-1.pdf [file NIHMS1738029-supplement-1.pdf]

**Supplemental Material: Cardiometabolic Health Outcomes Associated With Discordant Visceral and Liver Fat Phenotypes: The Dallas Heart Study**

Sanaa Tejani BA, Cody McCoy MD, Tiffany M. Powell-Wiley MD, MPH, Jean-Pierre Després, Jennifer Linge MSc, Olof Dahlqvist Leinhard, Mikael Petersson, Magnus Borga, Colby R. Ayers MS, Ian J. Neeland MD

## Supplemental Methods

Methods: Definitions of CVD and CHD in UK Biobank

Data used to create the definitions included: ICD-10 codes and corresponding dates from the inpatient hospital data - both primary and secondary diagnoses were used, OPCS-4 codes and corresponding dates from the inpatient hospital data - both main and secondary operation were used, ICD-10 codes for cause of death from the death register data - both primary and contributory causes of death were used, self-reported non-cancer illness codes (field 20002 in UK Biobank) - codes reported at any of the following visits were used: 0) Initial assessment visit (2006-2010), 1) First repeat assessment visit (2012-13), 2) Imaging visit (2014+). CVD cases were identified using the following ICD-10 codes and OPCS-4 codes. For the OPCS-4 codes, all subcategories of the codes were used (for example, L31 includes the codes L311, L312, L313, L314, L318, and L319).

| Category                                   | Type of code | Code | Meaning                                                             |
|--------------------------------------------|--------------|------|---------------------------------------------------------------------|
| Myocardial infarction                      | ICD-10       | I210 | I21.0 Acute transmural myocardial infarction of anterior wall       |
| Myocardial infarction                      | ICD-10       | I211 | I21.1 Acute transmural myocardial infarction of inferior wall       |
| Myocardial infarction                      | ICD-10       | I212 | I21.2 Acute transmural myocardial infarction of other sites         |
| Myocardial infarction                      | ICD-10       | I213 | I21.3 Acute transmural myocardial infarction of unspecified site    |
| Myocardial infarction                      | ICD-10       | I214 | I21.4 Acute subendocardial myocardial infarction                    |
| Myocardial infarction                      | ICD-10       | I219 | I21.9 Acute myocardial infarction, unspecified                      |
| Myocardial infarction                      | ICD-10       | I220 | I22.0 Subsequent myocardial infarction of anterior wall             |
| Myocardial infarction                      | ICD-10       | I221 | I22.1 Subsequent myocardial infarction of inferior wall             |
| Myocardial infarction                      | ICD-10       | I228 | I22.8 Subsequent myocardial infarction of other sites               |
| Myocardial infarction                      | ICD-10       | I229 | I22.9 Subsequent myocardial infarction of unspecified site          |
| Unstable angina hospitalization            | ICD-10       | I200 | I20.0 Unstable angina                                               |
| Percutaneous coronary intervention         | OPCS-4       | K49  | K49 Transluminal balloon angioplasty of coronary artery             |
| Percutaneous coronary intervention         | OPCS-4       | K50  | K50 Other therapeutic transluminal operations on coronary artery    |
| Coronary artery bypass graft surgery       | OPCS-4       | K40  | K40 Saphenous vein graft replacement of coronary artery             |
| Coronary artery bypass graft surgery       | OPCS-4       | K45  | K45 Connection of thoracic artery to coronary artery                |
| Coronary artery bypass graft surgery       | OPCS-4       | K46  | K46 Other bypass of coronary artery                                 |
| Ischemic stroke (cerebrovascular accident) | ICD-10       | I630 | I63.0 Cerebral infarction due to thrombosis of precerebral arteries |
| Ischemic stroke (cerebrovascular accident) | ICD-10       | I631 | I63.1 Cerebral infarction due to embolism of precerebral arteries   |

|                                             |        |      |                                                                                            |
|---------------------------------------------|--------|------|--------------------------------------------------------------------------------------------|
| Ischemic stroke (cerebrovascular accident)  | ICD-10 | I632 | I63.2 Cerebral infarction due to unspecified occlusion or stenosis of precerebral arteries |
| Ischemic stroke (cerebrovascular accident)  | ICD-10 | I633 | I63.3 Cerebral infarction due to thrombosis of cerebral arteries                           |
| Ischemic stroke (cerebrovascular accident)  | ICD-10 | I634 | I63.4 Cerebral infarction due to embolism of cerebral arteries                             |
| Ischemic stroke (cerebrovascular accident)  | ICD-10 | I635 | I63.5 Cerebral infarction due to unspecified occlusion or stenosis of cerebral arteries    |
| Ischemic stroke (cerebrovascular accident)  | ICD-10 | I636 | I63.6 Cerebral infarction due to cerebral venous thrombosis, nonpyogenic                   |
| Ischemic stroke (cerebrovascular accident)  | ICD-10 | I638 | I63.8 Other cerebral infarction                                                            |
| Ischemic stroke (cerebrovascular accident)  | ICD-10 | I639 | I63.9 Cerebral infarction, unspecified                                                     |
| Transient ischemic attack                   | ICD-10 | I650 | I65.0 Occlusion and stenosis of vertebral artery                                           |
| Transient ischemic attack                   | ICD-10 | I651 | I65.1 Occlusion and stenosis of basilar artery                                             |
| Transient ischemic attack                   | ICD-10 | I652 | I65.2 Occlusion and stenosis of carotid artery                                             |
| Transient ischemic attack                   | ICD-10 | I653 | I65.3 Occlusion and stenosis of multiple and bilateral precerebral arteries                |
| Transient ischemic attack                   | ICD-10 | I658 | I65.8 Occlusion and stenosis of other precerebral artery                                   |
| Transient ischemic attack                   | ICD-10 | I659 | I65.9 Occlusion and stenosis of unspecified precerebral artery                             |
| Transient ischemic attack                   | ICD-10 | I660 | I66.0 Occlusion and stenosis of middle cerebral artery                                     |
| Transient ischemic attack                   | ICD-10 | I661 | I66.1 Occlusion and stenosis of anterior cerebral artery                                   |
| Transient ischemic attack                   | ICD-10 | I662 | I66.2 Occlusion and stenosis of posterior cerebral artery                                  |
| Transient ischemic attack                   | ICD-10 | I663 | I66.3 Occlusion and stenosis of cerebellar arteries                                        |
| Transient ischemic attack                   | ICD-10 | I664 | I66.4 Occlusion and stenosis of multiple and bilateral cerebral arteries                   |
| Transient ischemic attack                   | ICD-10 | I668 | I66.8 Occlusion and stenosis of other cerebral artery                                      |
| Transient ischemic attack                   | ICD-10 | I669 | I66.9 Occlusion and stenosis of unspecified cerebral artery                                |
| Cerebrovascular revascularization procedure | OPCS-4 | L29  | L29 Reconstruction of carotid artery                                                       |
| Cerebrovascular revascularization procedure | OPCS-4 | L30  | L30 Other open operations on carotid artery                                                |
| Cerebrovascular revascularization procedure | OPCS-4 | L31  | L31 Transluminal operations on carotid artery                                              |
| Cerebrovascular revascularization procedure | OPCS-4 | L33  | L33 Operations on aneurysm of cerebral artery                                              |
| Cerebrovascular revascularization procedure | OPCS-4 | L34  | L34 Other open operations on cerebral artery                                               |
| Cerebrovascular revascularization procedure | OPCS-4 | L35  | L35 Transluminal operations on cerebral artery                                             |

|                                                         |        |      |                                                                           |
|---------------------------------------------------------|--------|------|---------------------------------------------------------------------------|
| Peripheral arterial disease revascularization procedure | OPCS-4 | L16  | L16 Extra-anatomic bypass of aorta                                        |
| Peripheral arterial disease revascularization procedure | OPCS-4 | L18  | L18 Emergency replacement of aneurysmal segment of aorta                  |
| Peripheral arterial disease revascularization procedure | OPCS-4 | L19  | L19 Other replacement of aneurysmal segment of aorta                      |
| Peripheral arterial disease revascularization procedure | OPCS-4 | L20  | L20 Other emergency bypass of segment of aorta                            |
| Peripheral arterial disease revascularization procedure | OPCS-4 | L21  | L21 Other bypass of segment of aorta                                      |
| Peripheral arterial disease revascularization procedure | OPCS-4 | L22  | L22 Attention to prosthesis of aorta                                      |
| Peripheral arterial disease revascularization procedure | OPCS-4 | L23  | L23 Plastic repair of aorta                                               |
| Peripheral arterial disease revascularization procedure | OPCS-4 | L25  | L25 Other open operations on aorta                                        |
| Peripheral arterial disease revascularization procedure | OPCS-4 | L26  | L26 Transluminal operations on aorta                                      |
| Peripheral arterial disease revascularization procedure | OPCS-4 | L27  | L27 Transluminal insertion of stent graft for aneurysmal segment of aorta |
| Peripheral arterial disease revascularization procedure | OPCS-4 | L28  | L28 Transluminal operations on aneurysmal segment of aorta                |
| Peripheral arterial disease revascularization procedure | OPCS-4 | L50  | L50 Other emergency bypass of iliac artery                                |
| Peripheral arterial disease revascularization procedure | OPCS-4 | L51  | L51 Other bypass of iliac artery                                          |
| Peripheral arterial disease revascularization procedure | OPCS-4 | L52  | L52 Reconstruction of iliac artery                                        |
| Peripheral arterial disease revascularization procedure | OPCS-4 | L53  | L53 Other open operations on iliac artery                                 |
| Peripheral arterial disease revascularization procedure | OPCS-4 | L54  | L54 Transluminal operations on iliac artery                               |
| Peripheral arterial disease revascularization procedure | OPCS-4 | L56  | L56 Emergency replacement of aneurysmal femoral artery                    |
| Peripheral arterial disease revascularization procedure | OPCS-4 | L57  | L57 Other replacement of aneurysmal femoral artery                        |
| Peripheral arterial disease revascularization procedure | OPCS-4 | L58  | L58 Other emergency bypass of femoral artery                              |
| Peripheral arterial disease revascularization procedure | OPCS-4 | L59  | L59 Other bypass of femoral artery                                        |
| Peripheral arterial disease revascularization procedure | OPCS-4 | L60  | L60 Reconstruction of femoral artery                                      |
| Peripheral arterial disease revascularization procedure | OPCS-4 | L62  | L62 Other open operations on femoral artery                               |
| Peripheral arterial disease revascularization procedure | OPCS-4 | L63  | L63 Transluminal operations on femoral artery                             |
| Heart failure (systolic or diastolic) hospitalization   | ICD-10 | I501 | I50.1 Left ventricular failure                                            |
| Heart failure (systolic or diastolic) hospitalization   | ICD-10 | I509 | I50.9 Heart failure, unspecified                                          |

|                                     |        |      |                                                           |
|-------------------------------------|--------|------|-----------------------------------------------------------|
| Atrial fibrillation hospitalization | ICD-10 | I480 | I48.0 Paroxysmal atrial fibrillation                      |
| Atrial fibrillation hospitalization | ICD-10 | I481 | I48.1 Persistent atrial fibrillation                      |
| Atrial fibrillation hospitalization | ICD-10 | I482 | I48.2 Chronic atrial fibrillation                         |
| Atrial fibrillation hospitalization | ICD-10 | I489 | I48.9 Atrial fibrillation and atrial flutter, unspecified |

The following variables were created:

- cvd\_pre = 1 if the subject had any of the ICD-10 or OPCS-4 codes with a corresponding date less than its scanning date. Otherwise cvd\_pre = 0.
- cvd\_post = 1 if the subject had any of the ICD-10 or OPCS-4 codes with a corresponding date greater or equal than its scanning date. Otherwise cvd\_post = 0.

The following self-reported non-cancer illness codes were used to exclude controls:

1066 - heart/cardiac problem

1067 - peripheral vascular disease

1068 - venous thromboembolic disease

1493 - other venous/lymphatic disease

Controls were excluded as follows: If a subject had both cvd\_pre = 0 and cvd\_post = 0, and, in addition, reported any of the codes above, then both cvd\_pre and cvd\_post were set to missing values.

**Supplemental Table 1. Median cutoffs used for high visceral adipose tissue (VAT) and high liver fat (LF) in the Dallas Heart Study and UK Biobank**

|                 | Dallas Heart Study | UK Biobank |
|-----------------|--------------------|------------|
| <b>VAT (kg)</b> |                    |            |
| Male            |                    | 4.73       |
| Black           | 6.52               | --         |
| Non-Black       | 6.95               | --         |
| Female          |                    | 2.35       |
| Black           | 3.89               | --         |
| Non-Black       | 5.16               | --         |
| <b>LF (%)</b>   |                    |            |
| Male            |                    | 3.21       |
| Hispanic        | 3.63               | --         |
| Non-Hispanic    | 3.20               | --         |
| Female          |                    | 2.45       |
| Hispanic        | 4.16               | --         |
| Non-Hispanic    | 3.23               | --         |

**Supplemental Table 2. Baseline characteristics of the Dallas Heart Study population stratified by normal/abnormal visceral adipose tissue**

|                                                            | <b>Normal VAT<br/>(n=1616)</b> | <b>Abnormal VAT<br/>(n=448)</b> | <b>p-value</b> |
|------------------------------------------------------------|--------------------------------|---------------------------------|----------------|
| Age, median (IQR)                                          | 44 (36,52)                     | 47 (40, 54)                     | <.001          |
| Female, No. (%)                                            | 1022 (63.2)                    | 91 (20.3)                       | <.001          |
| Race, No. (%)                                              |                                |                                 |                |
| White                                                      | 465 (28.8)                     | 200 (44.6)                      | <.001          |
| Black                                                      | 838 (51.9)                     | 138 (30.8)                      | <.001          |
| Hispanic                                                   | 281 (17.4)                     | 97 (21.7)                       | .04            |
| Other                                                      | 32 (2.0)                       | 13 (2.9)                        | .24            |
| Weight, median (IQR)- kg                                   | 78 (67.1, 90.3)                | 98 (88, 110.7)                  | <.001          |
| Height, median (IQR)- cm                                   | 166.4 (159, 172.3)             | 172.7 (165.1, 180.3)            | <.001          |
| Body Mass Index, median (IQR)- kg/m <sup>2</sup>           | 27.9 (24.5, 32.4)              | 32.7 (29.8, 36.6)               | <.001          |
| Waist Circumference, median (IQR)- cm                      | 93 (84.5, 102)                 | 110 (103, 118.5)                | <.001          |
| VAT, median (IQR)- kg                                      | 1.8 (1.3, 2.3)                 | 3.4 (3.1, 3.8)                  | <.001          |
| LF, median (IQR)- %                                        | 3.04 (1.84, 5.12)              | 7.21 (4.01, 12.53)              | <.001          |
| DEXA                                                       |                                |                                 |                |
| Fat mass, median (IQR)- kg <sup>a</sup>                    | 24 (17.6, 32.1)                | 28.5 (23.8, 36.7)               | <.001          |
| Lean mass, median (IQR)- kg <sup>a</sup>                   | 51.5 (43.5, 60.3)              | 65.7 (58.1, 72.7)               | <.001          |
| Lower body fat, median (IQR)- kg <sup>a</sup>              | 8.8 (6.1, 11.9)                | 8.6 (6.7, 11.3)                 | .99            |
| Truncal fat, median (IQR)- kg <sup>a</sup>                 | 11.4 (8.1, 15.6)               | 16.0 (13.0, 19.6)               | <.001          |
| Diabetes Mellitus, No. (%) <sup>b</sup>                    | 148 (9.2)                      | 83 (18.5)                       | <.001          |
| Hypercholesterolemia, No. (%)                              | 202 (12.5)                     | 77 (17.2)                       | .01            |
| Low High-density lipoprotein cholesterol, No. (%)          | 636 (39.4)                     | 235 (52.5)                      | <.001          |
| Metabolic Syndrome, No. (%)                                | 465 (28.8)                     | 269 (60.0)                      | <.001          |
| Current Smoker, No. (%) <sup>c</sup>                       | 414 (25.7)                     | 101 (22.6)                      | .18            |
| Prior Cardiovascular disease, No. (%)                      | 100 (6.2)                      | 36 (8.0)                        | .16            |
| Physical Activity, median (IQR)- MET min/week <sup>d</sup> | 133 (0, 544)                   | 133 (0, 540)                    | .63            |

Abnormal VAT is defined as 2.87 kg, or  $\geq$  95<sup>th</sup> percentile of population without hypertension, dyslipidemia, high triglycerides, obesity, T2DM, or CVD.<sup>a</sup>n = 2022, <sup>b</sup>n = 2063, <sup>c</sup>n = 2059, <sup>d</sup>n = 1918

**Supplemental Table 3. Baseline characteristics of the Dallas Heart Study population stratified by normal/abnormal liver fat**

|                                                            | <b>Normal LF</b>       | <b>Abnormal LF</b>      | <b>p-value</b> |
|------------------------------------------------------------|------------------------|-------------------------|----------------|
| Age, median (IQR)                                          | 44 (36, 53)            | 46 (38, 53)             | .01            |
| Female, No. (%)                                            | 807 (56.7)             | 306 (47.7)              | <.001          |
| Race, No. (%)                                              |                        |                         |                |
| White                                                      | 449 (31.6)             | 216 (33.7)              | .33            |
| Black                                                      | 750 (52.7)             | 226 (35.3)              | <.001          |
| Hispanic                                                   | 204 (14.3)             | 174 (27.2)              | <.001          |
| Other                                                      | 20 (1.4)               | 25 (3.9)                | <.001          |
| Weight, median (IQR)- kg                                   | 78 (66.9, 90.7)        | 92.5 (79.8, 106)        | <.001          |
| Height, median (IQR)- cm                                   | 167.6<br>(160.0,175.3) | 167.6<br>(160.0, 175.3) | .84            |
| Body Mass Index, median (IQR)- kg/m <sup>2</sup>           | 27.6 (24.3, 31.7)      | 32.6 (28.9, 36.6)       | <.001          |
| Waist Circumference, median (IQR)- cm                      | 93 (84, 102.5)         | 106 (97, 116)           | <.001          |
| VAT, median (IQR)- kg                                      | 1.8 (1.3, 2.4)         | 2.7 (2.2, 3.4)          | <.001          |
| LF, median (IQR)- %                                        | 2.60 (1.67, 3.71)      | 9.85 (7.22, 15.04)      | <.001          |
| DEXA                                                       |                        |                         |                |
| Fat mass, median (IQR)- kg <sup>a</sup>                    | 23.3 (17.1, 30.6)      | 29.6 (23.7, 38.2)       | <.001          |
| Lean mass, median (IQR)- kg <sup>a</sup>                   | 52.4 (43.8, 61.7)      | 58.8 (49.9, 67.9)       | <.001          |
| Lower body fat, median (IQR)- kg <sup>a</sup>              | 8.6 (6.0, 11.5)        | 9.4 (6.9, 12.5)         | <.001          |
| Truncal fat, median (IQR)- kg <sup>a</sup>                 | 11.1 (7.9, 14.9)       | 15.8 (12.5, 19.7)       | <.001          |
| Diabetes Mellitus, No. (%) <sup>b</sup>                    | 103 (7.2)              | 128 (20)                | <.001          |
| Hypercholesterolemia, No. (%)                              | 167 (11.7)             | 112 (17.5)              | <.001          |
| Low High-density lipoprotein cholesterol, No. (%)          | 521 (36.6)             | 350 (54.6)              | <.001          |
| Metabolic Syndrome, No. (%)                                | 359 (25.2)             | 375 (58.5)              | <.001          |
| Current Smoker, No. (%) <sup>c</sup>                       | 374 (26.4)             | 141 (22)                | .03            |
| Prior Cardiovascular disease, No. (%)                      | 88 (6.2)               | 48 (7.5)                | .27            |
| Physical Activity, median (IQR)- MET min/week <sup>d</sup> | 159 (0, 630)           | 109 (0, 495)            | .03            |

Abnormal LF is defined as  $\geq 5.5\%$ . <sup>a</sup>n = 2022, <sup>b</sup>n = 2063, <sup>c</sup>n = 2059, <sup>d</sup>n = 1918



**Supplemental Table 4. Association of visceral adipose tissue (VAT) and liver fat (LF) with prevalent cardiovascular disease (CVD) and type 2 diabetes mellitus (T2DM) in the Dallas Heart Study**

|                | Prevalent CVD      |         | Prevalent T2DM      |         |
|----------------|--------------------|---------|---------------------|---------|
|                | HR (95% CI)        | p-value | Odds Ratio (95% CI) | p-value |
| <b>Model 1</b> |                    |         |                     |         |
| VAT            | 1.44 (1.26 - 1.63) | <.001   | 1.58 (1.37 - 1.81)  | <.001   |
| LF             | 0.99 (0.97- 1.02)  | .63     | 1.32 (1.17 - 1.49)  | <.001   |
| <b>Model 2</b> |                    |         |                     |         |
| VAT            | 1.21 (1.06 - 1.40) | .007    | 1.24 (1.06-1.45)    | .01     |
| LF             | 1.00 (0.98 - 1.03) | .95     | 1.33 (1.17 - 1.50)  | <.001   |
| <b>Model 3</b> |                    |         |                     |         |
| VAT            | 0.95 (0.79 - 1.15) | .60     | 1.30 ( 1.05 - 1.62) | .02     |
| LF             | 1.02 (0.99 - 1.05) | .09     | 1.34 (1.17 - 1.56)  | <.001   |

HR calculated for incident CVD and OR calculated for incident T2DM.

Model 1 is unadjusted

Model 2 is adjusted for age and BMI

Model 3 is adjusted for Model 2 + sex, race/ethnicity, smoking, hypercholesterolemia, hypertension, physical activity, postmenopausal status (women only), and family history of CVD or T2DM

**Supplemental Table 5. Associations of visceral adipose tissue (VAT) and liver fat (LF) with biomarkers of cardiometabolic risk in the Dallas Heart Study**

|                                  | High VAT / High LF |         |         | High VAT / Low LF |         |         | Low VAT / High LF |         |         |
|----------------------------------|--------------------|---------|---------|-------------------|---------|---------|-------------------|---------|---------|
|                                  | Model 1            | Model 2 | Model 3 | Model 1           | Model 2 | Model 3 | Model 1           | Model 2 | Model 3 |
| <b>LDL-C (mg/dL)</b>             | 0.11*              | 0.08*   | 0.09*   | 0.10*             | 0.08*   | 0.09*   | 0.05              | 0.04    | 0.04    |
| <b>LDL small (nm)</b>            | 0.68*              | 0.51*   | 0.48*   | 0.48*             | 0.35*   | 0.34*   | 0.36*             | 0.31*   | 0.28*   |
| <b>Total Cholesterol (mg/dL)</b> | 0.06*              | 0.07*   | 0.07*   | 0.04*             | 0.04*   | 0.04*   | 0.05*             | 0.05*   | 0.05*   |
| <b>LDL large (nm)</b>            | -0.41*             | -0.42*  | -0.38*  | -0.17*            | -0.18*  | -0.17*  | -0.24*            | -0.25*  | -0.23*  |
| <b>LDL med small (nm)</b>        | 0.66*              | 0.50*   | 0.46*   | 0.44*             | 0.31*   | 0.30*   | 0.33*             | 0.28*   | 0.25*   |
| <b>LDL very small (nm)</b>       | 0.69*              | 0.51*   | 0.48*   | 0.50*             | 0.36*   | 0.35*   | 0.35*             | 0.29*   | 0.27*   |
| <b>LDL size (nm)</b>             | -0.03*             | -0.03*  | -0.03*  | -0.02*            | -0.02*  | -0.02*  | -0.02*            | -0.02*  | -0.02*  |
| <b>VLDL small (nm)</b>           | 0.22*              | 0.18*   | 0.18*   | 0.23*             | 0.20*   | 0.18*   | -0.02             | -0.04   | -0.03   |
| <b>VLDL medium (nm)</b>          | 0.49*              | 0.54*   | 0.50*   | 0.39*             | 0.42*   | 0.42*   | 0.38*             | 0.40*   | 0.38*   |
| <b>VLDL size (nm)</b>            | 0.094*             | 0.10*   | 0.08*   | -0.02             | -0.01   | -0.02   | 0.04*             | 0.04*   | 0.03*   |
| <b>HDL small (nm)</b>            | 0.13*              | 0.12*   | 0.13*   | 0.09*             | 0.08*   | 0.08*   | 0.09*             | 0.08*   | 0.08*   |
| <b>HDL size (nm)</b>             | -0.04*             | -0.03*  | -0.03*  | -0.03*            | -0.02*  | -0.02*  | -0.02*            | -0.02*  | -0.01*  |
| <b>Triglycerides (mg/dL)</b>     | 0.48*              | 0.47*   | 0.42*   | 0.19*             | 0.18*   | 0.18*   | 0.29*             | 0.29*   | 0.26*   |
| <b>VLDL large (nm)</b>           | 0.91*              | 0.91*   | 0.84*   | 0.33*             | 0.32*   | 0.31*   | 0.60*             | 0.60*   | 0.56*   |

|                                         |        |        |        |        |        |        |        |         |                 |
|-----------------------------------------|--------|--------|--------|--------|--------|--------|--------|---------|-----------------|
| <b>HDL-C (mg/dL)</b>                    | -0.19* | -0.14* | -0.12* | -0.14* | -0.10* | -0.10* | -0.09* | -0.07*  | -0.06*          |
| <b>HDL large (nm)</b>                   | -0.47* | -0.38* | -0.33* | -0.28* | -0.22* | -0.20* | -0.23* | -0.20*  | -0.18*          |
| <b>MPO (ng/mL)</b>                      | 0.10*  | 0.05   | 0.06   | 0.09*  | 0.06   | 0.06   | 0.01   | -0.002  | -0.001          |
| <b>PGRPs (ng/mL)</b>                    | 0.13*  | 0.08*  | 0.07*  | 0.12*  | 0.08*  | 0.08*  | -0.001 | -0.02   | -0.03           |
| <b>Adiponectin(ng/mL)</b>               | -0.45* | -0.35* | -0.31* | -0.26* | -0.19* | -0.19* | -0.29* | -0.26*  | -0.25*          |
| <b>Leptin (µg/L)</b>                    | 1.15*  | 0.43*  | 0.37*  | 0.89*  | 0.34*  | 0.33*  | 0.52*  | 0.30*   | 0.28*           |
| <b>Glucose (mg/dL)</b>                  | 0.12*  | 0.08*  | 0.02   | 0.05*  | 0.02   | 0.01   | 0.06*  | 0.05*   | 0.02            |
| <b>Fructosamine (µU/mL)</b>             | -0.02* | 0.006  | -0.01  | -0.03* | -0.01  | -0.01  | 0.006  | 0.02    | 0.005           |
| <b>Insulin (µU/mL)</b>                  | 0.91*  | 0.60*  | 0.35*  | 0.47*  | 0.24*  | 0.21*  | 0.37*  | 0.28*   | 0.20*           |
| <b>HOMA-IR (units)</b>                  | 1.0*   | 0.68*  | 0.37*  | 0.53*  | 0.27*  | 0.22*  | 0.42*  | 0.32*   | 0.22*           |
| <b>Caspase-3 (ng/mL)</b>                | 0.05   | 0.05   | 0.02   | -0.05  | -0.48  | -0.05  | 0.03   | 0.03    | 0.02            |
| <b>Uric Acid (mg/mL)</b>                | 0.20*  | 0.13*  | 0.12*  | 0.11*  | 0.06*  | 0.06*  | 0.11*  | 0.09*   | 0.09*           |
| <b>CAC (Agatston Unit)</b>              | 0.46*  | 0.18   | 0.08   | 0.20   | 0.004  | -0.03  | 0.16   | 0.06    | 0.03            |
| <b>AWT (mm)</b>                         | 0.09*  | 0.09*  | 0.07*  | 0.05*  | 0.05*  | 0.04   | 0.03   | 0.03    | 0.03            |
| <b>APB (%)</b>                          | 0.24*  | 0.47*  | 0.34*  | -0.13  | 0.05   | 0.001  | 0.11   | 0.17    | 0.13            |
| <b>eGFR (ml/min/1.73 m<sup>2</sup>)</b> | -0.01  | -0.003 | -0.009 | -0.02  | -0.01  | -0.01  | -0.003 | -0.0002 | 0.002           |
| <b>Cystatin C (mg/L)</b>                | 0.07*  | 0.01   | 0.007  | 0.06*  | 0.01   | 0.01   | -0.001 | -0.02   | -0.02           |
| <b>D-Dimer (ng/mL)</b>                  | 0.05   | -0.01  | -0.02  | 0.14*  | 0.09   | 0.08   | 0.03   | 0.01    | -<br>0.000<br>3 |

|                        |        |        |        |        |        |         |        |        |        |
|------------------------|--------|--------|--------|--------|--------|---------|--------|--------|--------|
| <b>sCD40L (ng/mL)</b>  | -0.09* | -0.13* | -0.17* | -0.09* | -0.12* | -0.13*  | 0.003  | -0.008 | -0.02  |
| <b>sESAM (ng/mL)</b>   | 0.04   | -0.001 | -0.02  | 0.04   | 0.003  | -0.0005 | -0.006 | -0.02  | -0.03  |
| <b>sVCAM (ng/mL)</b>   | -0.03  | -0.03  | -0.04  | -0.06  | -0.06  | -0.07   | 0.04   | 0.04   | 0.03   |
| <b>sICAM (ng/mL)</b>   | -0.04  | -0.04  | -0.07  | -0.06  | -0.07  | -0.08   | 0.03   | 0.03   | 0.02   |
| <b>hs-CRP (mg/L)</b>   | 0.93*  | 0.35*  | 0.32*  | 0.69*  | 0.26*  | 0.25*   | 0.45*  | 0.27*  | 0.26*  |
| <b>PG (ng/mL)</b>      | 0.09*  | 0.16*  | 0.16*  | 0.04   | 0.1*   | 0.1*    | 0.04   | 0.06   | 0.06   |
| <b>MCP-1 (pg/mL)</b>   | 0.0008 | -0.02  | -0.05  | 0.01   | -0.004 | -0.01   | -0.007 | -0.02  | -0.03  |
| <b>MMP-9 (ng/mL)</b>   | 0.19*  | 0.16*  | 0.14*  | 0.06   | 0.04   | 0.45    | -0.04  | -0.05  | -0.04  |
| <b>CCL11 (pg/mL)</b>   | -0.04  | 0.07   | 0.05   | -0.16  | -0.07  | -0.07   | -0.09  | -0.06  | -0.08  |
| <b>CXCL1 (ng/mL)</b>   | 0.013  | 0.007  | 0.01   | 0.02   | 0.01   | 0.01    | 0.008  | 0.007  | 0.007  |
| <b>CXCL2 (ng/mL)</b>   | -0.02  | -0.02  | -0.01  | -0.02  | -0.02  | -0.02   | -0.02  | -0.02  | -0.01  |
| <b>LTβR (ng/mL)</b>    | 0.04*  | 0.02   | 0.006  | 0.06*  | 0.04   | 0.04    | -0.01  | -0.02  | -0.02  |
| <b>GDF-15 (ng/mL)</b>  | -0.03  | 0.01   | 0.01   | -0.04  | -0.01  | -0.007  | -0.04  | -0.02  | -0.02  |
| <b>sRAGE (ng/mL)</b>   | -0.09* | -0.03  | -0.03  | -0.06* | -0.01  | -0.02   | -0.06* | -0.04  | -0.04  |
| <b>hs-cTnT (ng/mL)</b> | 0.12*  | 0.10*  | 0.10*  | 0.11*  | 0.10   | 0.10    | 0.13*  | 0.13*  | 0.12*  |
| <b>BNP (pg/mL)</b>     | -0.17* | -0.19  | -0.14  | 0.08   | 0.06   | 0.07    | -0.20* | -0.21* | -0.19* |
| <b>Pro-BNP (pg/mL)</b> | -0.37* | -0.37* | -0.29* | -0.03  | -0.04  | -0.01   | -0.22* | -0.23* | -0.21* |
| <b>TNFR1A (ng/mL)</b>  | 0.18*  | 0.08   | 0.08   | 0.13*  | 0.05   | 0.06    | -0.02  | -0.04  | -0.05  |

\*P<0.05. Abbreviations: APB, aortic plaque burden; AWT, aortic wall thickness; BNP, B-type natriuretic peptide; CAC, coronary artery calcium; CCL11, chemokine (c-c motif) ligand 11; CXCL1, chemokine (c-x-c motif) 1; CXCL2, chemokine (cx-c motif) 2; eGFR, estimated glomerular filtration rate; GDF-15, growth differentiation factor-15; HDL-C, high-density lipoprotein cholesterol; hs-CRP, high-sensitivity C-reactive protein; hs-cTnT, highly sensitive cardiac troponin T; HOMA-IR, homeostasis model assessment of insulin resistance; LDL-C, low-density lipoprotein cholesterol; LTβR, lymphotoxin β receptor; MCP-1, monocyte chemoattractant protein-1; MMP-9, matrix metalloproteinase-9; MPO, myeloperoxidase; OPG, osteoprotegerin; PG, peptidoglycan, PGLYRP-1, peptidoglycan recognition protein-1; Pro BNP, Pro-B-type natriuretic peptide; sCD40L, soluble CD40 Ligand; sESAM, soluble endothelial cell-

selective molecule; sICAM, soluble intracellular adhesion molecule; sRAGE, soluble receptor for advanced glycation end products; sVCAM, soluble vascular cell adhesion molecule; TNFR1A, tumor necrosis factor alpha-1 receptor

**Supplemental Table 6. Baseline characteristics of the study population free from prevalent cardiovascular disease or type 2 diabetes mellitus in the Dallas Heart Study**

| Characteristic                        | High VAT – High LF (n=609) | High VAT – Low LF (n=257) | Low VAT – High LF (n=257) | Low VAT – Low LF (n=608) | p-value |
|---------------------------------------|----------------------------|---------------------------|---------------------------|--------------------------|---------|
| Age, median (IQR)                     | 48 (36-53)                 | 46 (38-53)                | 41 (34-49)                | 40 (34-48)               | <.001   |
| Female, No. (%)                       | 331 (54.35)                | 140 (54.47)               | 140 (54.47)               | 331 (54.44)              | >.99    |
| Race, No. (%)                         |                            |                           |                           |                          |         |
| White                                 | 235 (38.59)                | 71 (27.63)                | 91 (35.41)                | 212 (34.87)              | .02     |
| Black                                 | 245 (40.23)                | 137 (53.31)               | 111 (43.19)               | 271 (44.57)              | .01     |
| Hispanic                              | 116 (19.05)                | 48 (18.68)                | 44 (17.12)                | 112 (18.42)              | .92     |
| Weight, median (IQR), kg              | 93.44 (82.33-106.82)       | 86.18 (75.3-100.24)       | 75.75 (66.86-85.20)       | 69.45 (61.96-80.15)      | <.001   |
| BMI, median (IQR), kg/m <sup>2</sup>  | 32.67 (29.41-36.85)        | 30.26 (27.42-34.21)       | 27.25 (24.89-30.38)       | 24.95 (22.47-27.50)      | <.001   |
| Waist circumference, median (IQR), cm | 106 (99-114.5)             | 100 (94-108)              | 91.5 (85-98)              | 85.5 (78-92.5)           | <.001   |
| VAT, median (IQR), kg                 | 2.76 (2.23-3.30)           | 2.38 (1.98-2.89)          | 1.56 (1.3-2.07)           | 1.36 (1.03-1.66)         | <.001   |
| Ectopic Liver Fat, median (IQR), %    | 6.98 (4.59-11.30)          | 2.33 (1.66 -2.84)         | 4.77 (3.90-7.47)          | 1.85 (1.20 -2.57)        | <.001   |
| Hypercholesterolemia, No. (%)         | 94 (15.44)                 | 32 (12.45)                | 30 (11.67)                | 39 (6.41)                | <.001   |
| Low HDL, No. (%)                      | 323 (53.04)                | 119 (46.30)               | 100 (38.91)               | 165 (27.14)              | <.001   |
| Metabolic Syndrome, No. (%)           | 319 (52.38)                | 82 (31.91)                | 57 (22.18)                | 42 (6.91)                | <.001   |
| Smoking, No. (%) <sup>c</sup>         | 132 (21.67)                | 58 (22.66)                | 52 (20.31)                | 168 (27.72)              | .03     |
| Hypertension, No. (%) <sup>a</sup>    | 227 (37.71)                | 84 (33.20)                | 60 (23.53)                | 96 (15.97)               | <.001   |
| HOMA-IR, median (IQR) <sup>b</sup>    | 4.15 (2.79-5.87)           | 2.86 (1.78-4.16)          | 2.42 (1.42-3.86)          | 1.56 (1.01-2.45)         | <.001   |
| ALT, median (IQR)                     | 23 (16-30)                 | 19 (15-28)                | 19 (14-29)                | 17 (13-24)               | <.001   |

|                                                     |                  |                  |                 |                 |       |
|-----------------------------------------------------|------------------|------------------|-----------------|-----------------|-------|
| AST, median (IQR)                                   | 21 (18-26)       | 20 (17-26)       | 21 (18-27)      | 20 (17-24)      | <.001 |
| Family History –<br>diabetes, No. (%)               | 255 (41.87)      | 88 (34.24)       | 78 (30.35)      | 197 (32.40)     | <.001 |
| Family History – CVD,<br>No. (%)                    | 513 (84.24)      | 213 (82.88)      | 201 (78.21)     | 469 (77.14)     | .01   |
| Physical activity <sup>d</sup>                      | 114 (0-472)      | 124 (0-639)      | 156 (0-660)     | 239 (0-727)     | <.001 |
| Postmenopausal, No.<br>(%) <sup>e</sup>             | 157 (25.86)      | 52 (20.23)       | 45 (17.51)      | 85 (14.07)      | <.001 |
| Aortic wall thickness,<br>median (IQR) <sup>f</sup> | 1.72 (1.55-1.89) | 1.69 (1.51-1.85) | 1.6 (1.44-1.78) | 1.6 (1.44-1.74) | <.001 |

p-value is trend across all VAT/LF groups

<sup>a</sup> n=602, n=253, n=255, n=601 for high VAT-high LF, high VAT-low LF, low VAT-high LF, low VAT-low LF, respectively

<sup>b</sup> n=594, n=256, n=252, n=588 for high VAT-high LF, high VAT-low LF, low VAT-high LF, low VAT-low LF, respectively

<sup>c</sup> n=609, n=256, n=256, n=606 for high VAT-high LF, high VAT-low LF, low VAT-high LF, low VAT-low LF, respectively

<sup>d</sup> n=566, n=238, n=238, n=560 for high VAT-high LF, high VAT-low LF, low VAT-high LF, low VAT-low LF, respectively

<sup>e</sup> n=607, n=257, n=257, n=604 for high VAT-high LF, high VAT-low LF, low VAT-high LF, low VAT-low LF, respectively

<sup>f</sup> n=539, n=226, n=233, n=553 for high VAT-high LF, high VAT-low LF, low VAT-high LF, low VAT-low LF, respectively

**Supplemental Table 7. Frequency of cardiovascular disease event types by body fat phenotype in the Dallas Heart Study**

| CVD Event                                  | Phenotype        |                 |                 |                |
|--------------------------------------------|------------------|-----------------|-----------------|----------------|
|                                            | High VAT-High LF | High VAT-Low LF | Low VAT-High LF | Low VAT-Low LF |
| MI                                         | 16               | 8               | 2               | 5              |
| CV Death                                   | 11               | 5               | 1               | 7              |
| CABG                                       | 6                | 0               | 0               | 0              |
| PCI                                        | 5                | 2               | 2               | 3              |
| Stroke                                     | 7                | 7               | 3               | 6              |
| Cerebrovascular<br>Revascularization Event | 0                | 1               | 2               | 2              |
| PAR                                        | 0                | 1               | 0               | 1              |
| CHF                                        | 8                | 4               | 2               | 3              |
| TIA                                        | 4                | 1               | 1               | 0              |
| Unstable Angina                            | 0                | 0               | 1               | 1              |
| <b>Total</b>                               | <b>57</b>        | <b>29</b>       | <b>14</b>       | <b>28</b>      |

Abbreviations: MI, myocardial infarction. CABG, coronary artery bypass graft surgery. PCI, percutaneous coronary intervention. PAR, peripheral arterial revascularization procedure CHF, congestive heart failure. TIA, transient ischemic attack.



**Supplemental Table 8. Associations of visceral adipose tissue (VAT) and liver fat (LF) as continuous markers with incident cardiovascular disease (CVD) and type 2 diabetes (T2DM) in the Dallas Heart Study**

|                                 | Incident CVD       |                 | Incident T2DM       |                 |
|---------------------------------|--------------------|-----------------|---------------------|-----------------|
|                                 | HR (95% CI)        | <i>p</i> -value | Odds Ratio (95% CI) | <i>p</i> -value |
| VAT                             | 1.24 (1.07 – 1.43) | .004            | 1.32 (1.06 – 1.64)  | .01             |
| LF                              | 0.98 (0.84 – 1.14) | .76             | 1.28 (1.08 – 1.52)  | .005            |
| <i>p</i> -value for interaction |                    | .19             |                     | .07             |

HR calculated for incident CVD and OR calculated for incident T2DM.  
 Model is adjusted for age and BMI.

**Supplemental Table 9. Multivariable-adjusted associations of body fat phenotypes with incident cardiovascular disease and type 2 diabetes using additional covariates in the Dallas Heart Study**

|                    | Incident CVD       |         | Incident T2DM       |         |
|--------------------|--------------------|---------|---------------------|---------|
|                    | HR (95% CI)        | p-value | Odds Ratio (95% CI) | p-value |
| <b>Model 3</b>     |                    |         |                     |         |
| High VAT-High LF   | 1.10 (0.62-1.98)   | .73     | 5.52 (2.49-12.23)   | <.001   |
| High VAT-Low LF    | 1.31 (0.71-2.42)   | .38     | 2.55 (1.01-6.45)    | .04     |
| Low VAT-High LF    | 1.16 (0.58-2.31)   | .67     | 2.65 (1.05-6.72)    | .04     |
| <b>Model 4</b>     |                    |         |                     |         |
| High VAT – High LF | 1.13 (0.63 – 2.02) | .69     | 4.29 (1.83 – 10.03) | <.001   |
| High VAT – Low LF  | 1.29 (0.69 – 2.40) | .43     | 2.46 (0.94 – 6.43)  | .07     |
| Low VAT – High LF  | 1.22 (0.61 – 2.44) | .57     | 2.75 (1.05 – 7.19)  | .04     |

HR calculated for incident CVD and OR calculated for incident T2DM. Referent group is low VAT-low LF.  
 Model 3 is adjusted for age, BMI, sex, race/ethnicity, smoking, hypercholesterolemia, hypertension, physical activity, postmenopausal status (women only), and family history of CVD or T2DM  
 Model 4 is adjusted for 3 + hs-CRP (CVD) or HOMA-IR (T2DM)

**Supplemental Table 10. Baseline characteristics of the study population free from prevalent cardiovascular disease in the UK Biobank study**

| Characteristic                                         | Overall<br>(n=22354)       | High VAT - High<br>LF (n=7848) | High VAT - Low<br>LF (n=2822) | Low VAT - High<br>LF (n=2982) | Low VAT - Low<br>LF (n=8702) | p-<br>value |
|--------------------------------------------------------|----------------------------|--------------------------------|-------------------------------|-------------------------------|------------------------------|-------------|
| <b>Age, median (IQR)</b>                               | 64 (57, 69)                | 64 (58, 69)                    | 64 (58, 69)                   | 64 (58, 69)                   | 62 (56, 68)                  | <.001       |
| <b>Female, No. (%)</b>                                 | 12067 (54.0)               | 4296 (54.7)                    | 1540 (54.6)                   | 1570 (52.6)                   | 4661 (53.6)                  | .08         |
| <b>Race, No. (%) [White]</b>                           | 21743 (97.3)               | 7687 (97.9)                    | 2771 (98.2)                   | 2844 (95.4)                   | 8441 (97.0)                  | <.001       |
| <b>Race, No. (%) [Black]</b>                           | 118 (0.5)                  | 22 (0.3)                       | 6 (0.2)                       | 30 (1.0)                      | 60 (0.7)                     | .01         |
| <b>Race, No. (%) [Asian]</b>                           | 195 (0.9)                  | 57 (0.7)                       | 13 (0.5)                      | 46 (1.5)                      | 79 (0.9)                     | .04         |
| <b>Race, No. (%) [Chinese]</b>                         | 69 (0.3)                   | 9 (0.1)                        | 2 (0.1)                       | 26 (0.9)                      | 32 (0.4)                     | <.001       |
| <b>Race, No. (%) [Mixed]</b>                           | 90 (0.4)                   | 26 (0.3)                       | 9 (0.3)                       | 13 (0.4)                      | 42 (0.5)                     | .10         |
| <b>Weight, median (IQR)- kg</b>                        | 74.1 (64.7, 84.4)<br>168.7 | 83.0 (73.4, 93.5)              | 79.1 (70.5, 88.4)             | 69.0 (60.9, 77.7)             | 67.3 (59.8, 75.6)            | <.001       |
| <b>Height, median (IQR)- cm</b>                        | (162.2, 176.0)             | 168.3 (162.0, 176.0)           | 169.7 (163.0, 177.2)          | 168.0 (161.5, 175.0)          | 169.0 (162.5, 176.0)         | .007        |
| <b>Body Mass Index, median (IQR)- kg/m<sup>2</sup></b> | 25.7 (23.3, 28.6)          | 28.8 (26.6, 31.7)              | 27.2 (25.3, 29.3)             | 24.4 (22.6, 26.2)             | 23.5 (21.9, 25.2)            | <.001       |
| <b>Waist Circumference, median (IQR)- cm</b>           | 88.0 (79.0, 97.0)          | 88.0 (79.0, 97.0)              | 87.0 (79.0, 96.8)             | 88.0 (79.0, 97.0)             | 88.0 (79.0, 96.0)            | .39         |
| <b>VAT, median (IQR)- L</b>                            | 3.2 (1.9, 4.9)             | 5.1 (3.6, 6.5)                 | 4.2 (2.9, 5.6)                | 2.2 (1.6, 3.8)                | 1.8 (1.3, 2.8)               | <.001       |
| <b>LF, median (IQR)- %</b>                             | 2.7 (1.8, 4.6)             | 5.4 (3.8, 9.1)                 | 2.1 (1.7, 2.4)                | 3.6 (3.0, 4.7)                | 1.8 (1.4, 2.2)               | <.001       |
| <b>Cholesterol Lowering Medication, No. (%)</b>        | 9.9 (7.3, 13.0)            | 13.6 (11.5, 16.3)              | 11.9 (10.5, 13.8)             | 8.4 (6.9, 9.8)                | 7.1 (5.5, 8.7)               | <.001       |
| <b>Current Smoker, No. (%)</b>                         | 9.6 (8.0, 12.1)            | 9.8 (8.3, 12.5)                | 9.7 (8.1, 12.2)               | 9.3 (7.8, 11.9)               | 9.4 (7.9, 11.8)              | <.001       |

**Supplemental Figure 1. Flow diagram of participant selection in the Dallas Heart Study**

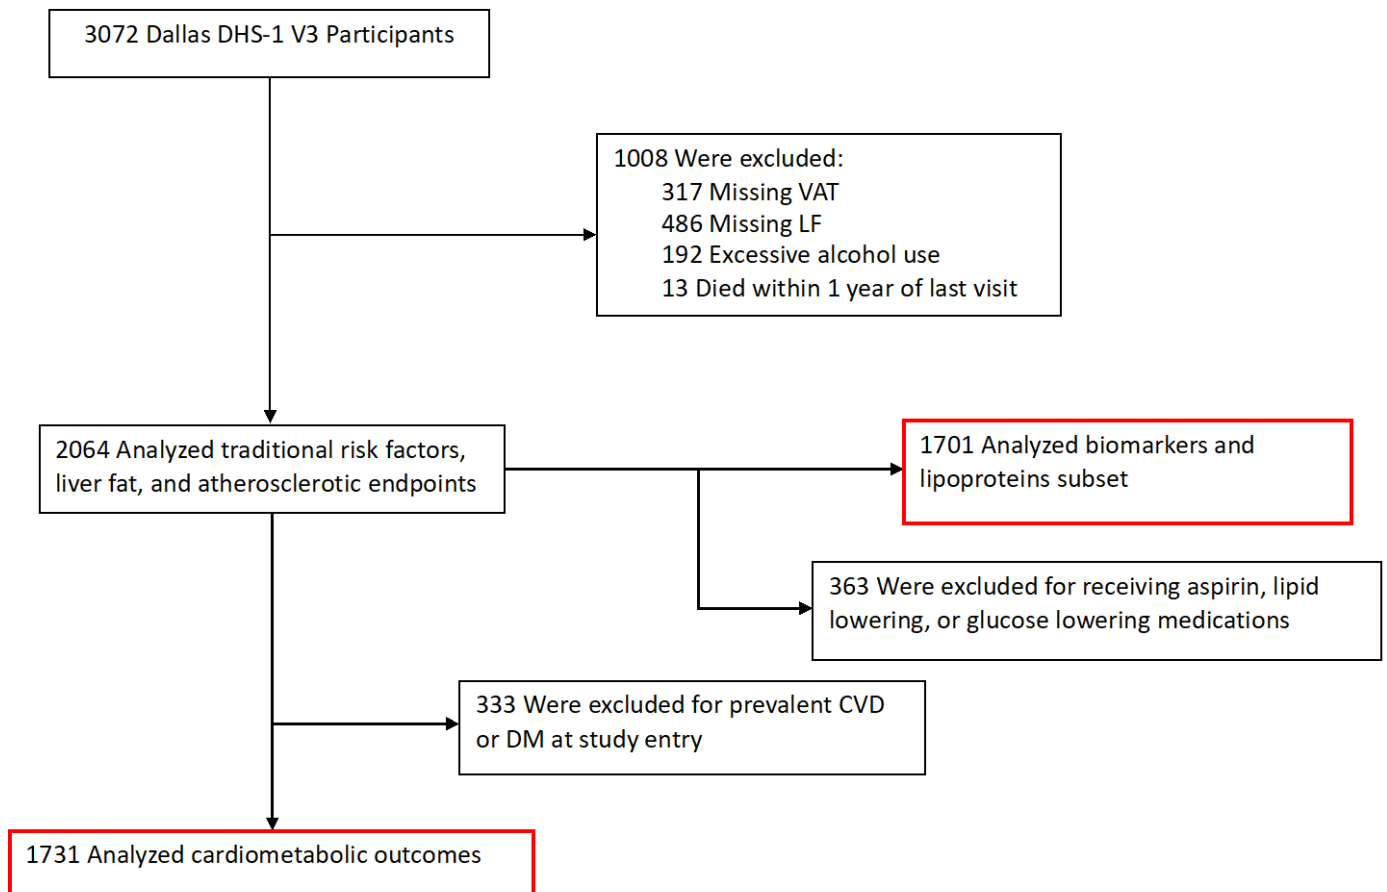

\*Excessive alcohol consumption defined as >14 drinks/week or >4 drinks/day for men under age 65 or >7 drinks/week or >3 drinks/day for men over age 65 or women.

**Supplemental Figure 2. Scatter plot of relationship between visceral adipose tissue and liver fat stratified by race/ethnicity in the Dallas Heart Study**

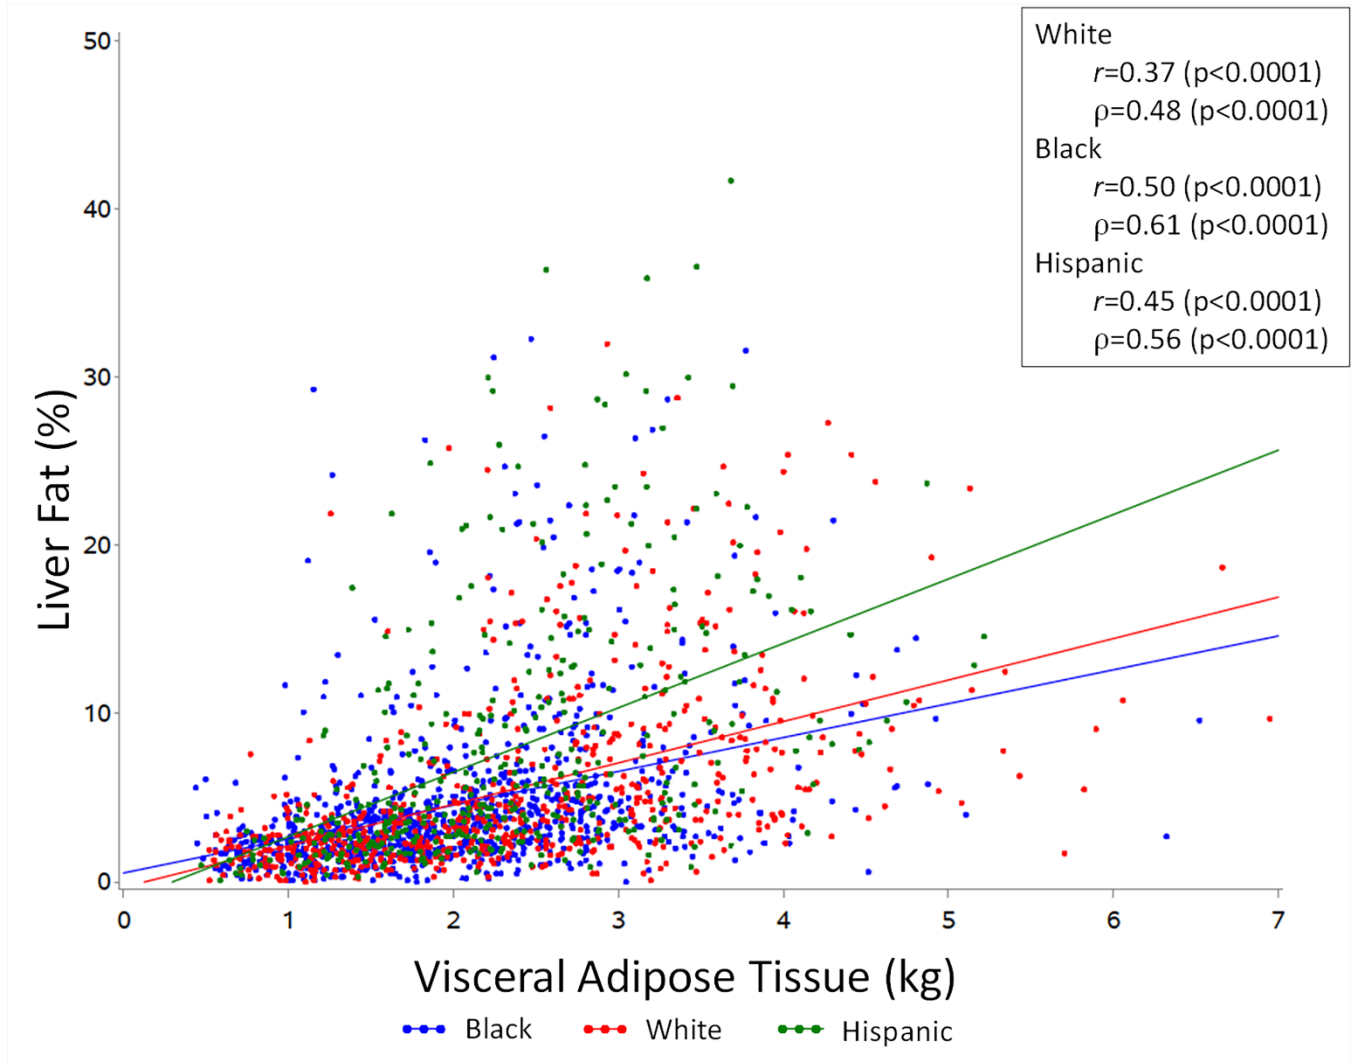

Stratification of VAT (x-axis) and LF (y-axis) by ethnicity: White (red), Black (blue), and Hispanic (green). Pearson's  $r$  and Spearman's  $\rho$  correlation are reported for each ethnicity. Hispanic participants have higher LF per VAT, while White and Black participants have higher VAT per LF.
